# Supplementary material for: Joint Association of Low Nadir Serum Sodium and Potassium with Worse Outcomes after Ischemic Stroke
Source: Hindawi journal article supplement (doi:10.1155/2024/5541608), 2024-01-01
Supplement: f1 [file 5541608.f1.docx]

**MATERIALS**

**Title: Joint association of low nadir serum sodium and potassium with worse outcomes after ischemic stroke.**

Zijuan Feng (fengzj0227@163.com), MD a†, Ting Chen ([cnkt1987@163.com), MD a†](mailto:cnkt1987@163.com),%20MD%20a†), Peng Liu (peng.liu.scu@qq.com), MD b,Ziyi Zhang (ziyizhangya@163.com), MD a, Zhetao Wang (wangzhetao02@163.com), BMc, Yanan Wang ([723684533@qq.com](mailto:723684533@qq.com)), Ph.D. a, Quhong Song ([18804026893@163.com](mailto:18804026893@163.com)), Ph.D. d, Chen Ye ([472925196@qq.com](mailto:472925196@qq.com)), Ph.D. a , Ming Liu ([wyplmh@hotmail.com](mailto:wyplmh@hotmail.com)), MD, Ph.D.a*, Shuting Zhang (shutingzhang@scu.edu.cn), MD, Ph.D.a*

**Figure numbers: 2**

**Table numbers: 2**

**Supplementary figure numbers: 4**

**Supplementary table numbers: 1**

**Supplementary Figure 1. Flow chart**

Flow chart illustrating the process of inclusion and exclusion of our study participants. In total, 3101 patients with acute ischemic stroke were screened, but 181 patients were excluded for the following reasons: presence of brain tumor or other stroke mimic, hypertension treated with diuretics, absence of informed consent, onset of symptoms >48 hours, presence of do-not-treat or do-not-resuscitate orders, absence of sodium or potassium value. Finally, 2920 patients were included in the final analysis.

**
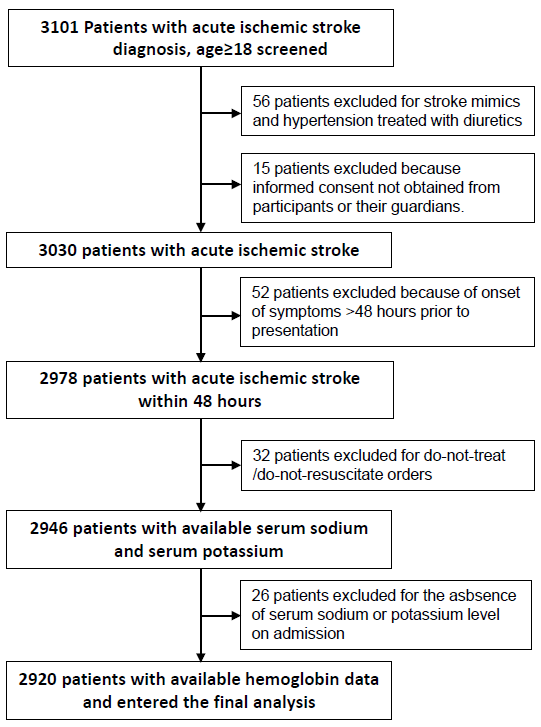
**

**Supplementary Figure 2. Dichotomized analysis of the modified Rankin Scale (mRS) distribution at 3-month for all patients according to the classification of the nadir NaK scale.**

**Supplementary Figure 3. Effects of low nadir s-sodium and s-potassium levels on 3-month death in ischemic stroke patients by age, sex, state of consciousness, severity and therapies.** Solid boxes represent estimates of low sodium/potassium effect; horizontal lines, 95% CI. Abbreviations: OR, odds ratio; CI, confidence interval; GCS, Glasgow Coma Scale; NIHSS, National Institutes of Health Stroke Scale.

**Supplementary Figure 4. Kaplan–Meier survival curve from day 0 until day 90 in patients according to the classification of the nadir NaK scale.**


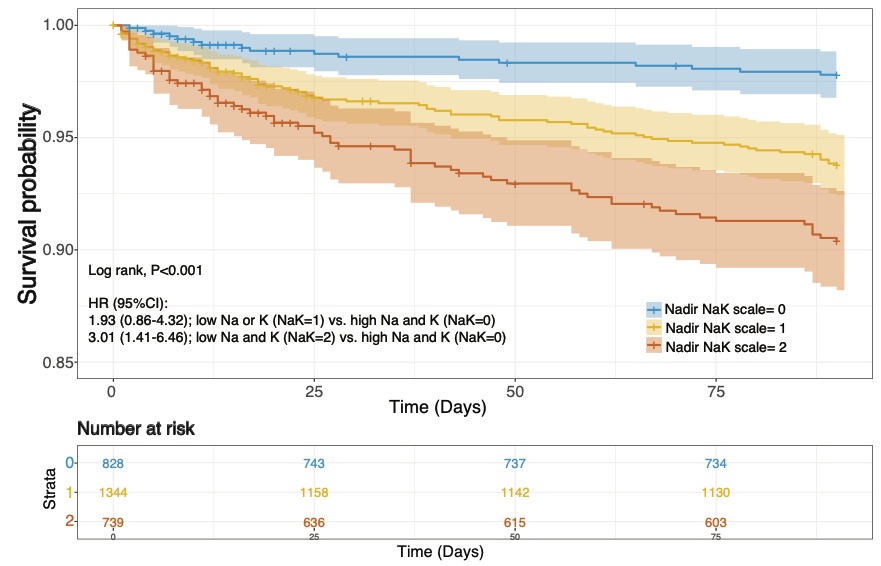


**Supplementary Table 1. Multivariable logistic regression analysis of the association between hyponatremia and hypokalemia and 3-month death.** All models were adjusted for age, sex, NIHSS scale, albumin, serum creatinine, random blood glucose, systolic blood pressure, pneumonia, and electrolyte-related therapies during hospitalization, such as saline, potassium intake, and mannitol. Abbreviations: aOR, adjusted odds ratio; NIHSS, National Institutes of Health Stroke Scale; SBP, systolic blood pressure.

|  | **3-month Death** | | | | | | | |
| --- | --- | --- | --- | --- | --- | --- | --- | --- |
|  | **Hyponatemia** | |  | **Hypokalemia** | |  | **Hyponatemia&Hypokalemia** | |
| **Variables** | **Odds Ratio** | **P value** |  | **Odds Ratio** | **P value** |  | **Odds Ratio** | **P value** |
| Sex | 0.80 (0.55-1.16) | 0.233 |  | 0.93 (0.60-1.43) | 0.729 |  | 1.32 (0.75-2.35) | 0.340 |
| Age | 1.03 (1.01-1.04) | 0.001 |  | 1.04 (1.02-1.06) | 0.001 |  | 1.04 (1.02-1.06) | 0.001 |
| NIHSS | 1.11 (1.08-1.14) | 0.001 |  | 1.10 (1.08-1.13) | 0.001 |  | 1.12 (1.08-1.16) | 0.001 |
| Creatinine | 1.00 (1.00-1.01) | 0.011 |  | 1.00 (1.00-1.01) | 0.023 |  | 1.00 (1.00-1.01) | 0.058 |
| Albumin | 0.97 (0.94-1.00) | 0.071 |  | 0.99 (0.95-1.03) | 0.553 |  | 0.98 (0.94-1.03) | 0.517 |
| Blood Glucose | 0.99 (0.94-1.04) | 0.784 |  | 0.99 (0.93-1.06) | 0.851 |  | 0.98 (0.90-1.06) | 0.643 |
| SBP | 1.00 (0.99-1.01) | 0.650 |  | 1.00 (0.99-1.01) | 0.763 |  | 1.00 (0.98-1.01) | 0.501 |
| Pneumonia | 2.45 (1.63-3.68) | 0.001 |  | 2.56 (1.60-4.11) | 0.001 |  | 2.63 (1.45-4.80) | 0.002 |
| Saline | 0.64 (0.51-0.79) | 0.001 |  | 0.62 (0.47-0.80) | 0.001 |  | 0.55 (0.38-0.76) | 0.001 |
| Mannitol | 0.97 (0.79-1.17) | 0.737 |  | 0.96 (0.76-1.20) | 0.707 |  | 0.95 (0.70-1.28) | 0.747 |
| Potassium intake | 1.30 (1.02-1.66) | 0.036 |  | 1.51 (1.12-2.04) | 0.007 |  | 1.83 (1.24-2.72) | 0.002 |
| **Electrolyte disorder** | **1.46 (0.96-2.19)** | **0.072** |  | **1.33 (0.84-2.10)** | **0.218** |  | **1.31 (0.69-2.43)** | **0.392** |
